# Supplementary material for: Understanding the formation of ultrathin mesoporous Li4Ti5O12 nanosheets and their application in high-rate, long-life lithium-ion anodes
Source: Royal Society of Chemistry journal article supplement (doi:10.1039/c8nr07249c), 2018-11-16
Supplement: c8nr07249c1.pdf [file c8nr07249c1.pdf]

## Supporting information

### Understanding the Formation of Ultrathin Mesoporous $\text{Li}_4\text{Ti}_5\text{O}_{12}$ Nanosheets and Their Application for High-Rate, Long-Life Lithium-Ion Anodes

Dongdong Wang,<sup>a,b</sup> Zhongqiang Shan,<sup>b</sup> Jianhua Tian<sup>b</sup> and Zheng Chen<sup>a,c,\*</sup>

<sup>a</sup>Department of NanoEngineering, University of California San Diego, La Jolla, CA 92093

<sup>b</sup>School of Chemical Engineering and Technology, Tianjin University, Tianjin 300350, P. R. China

<sup>c</sup>Program of Materials Science and Engineering, University of California San Diego, La Jolla, CA 92093

\*Correspondence to: zhengchen@eng.ucsd.edu

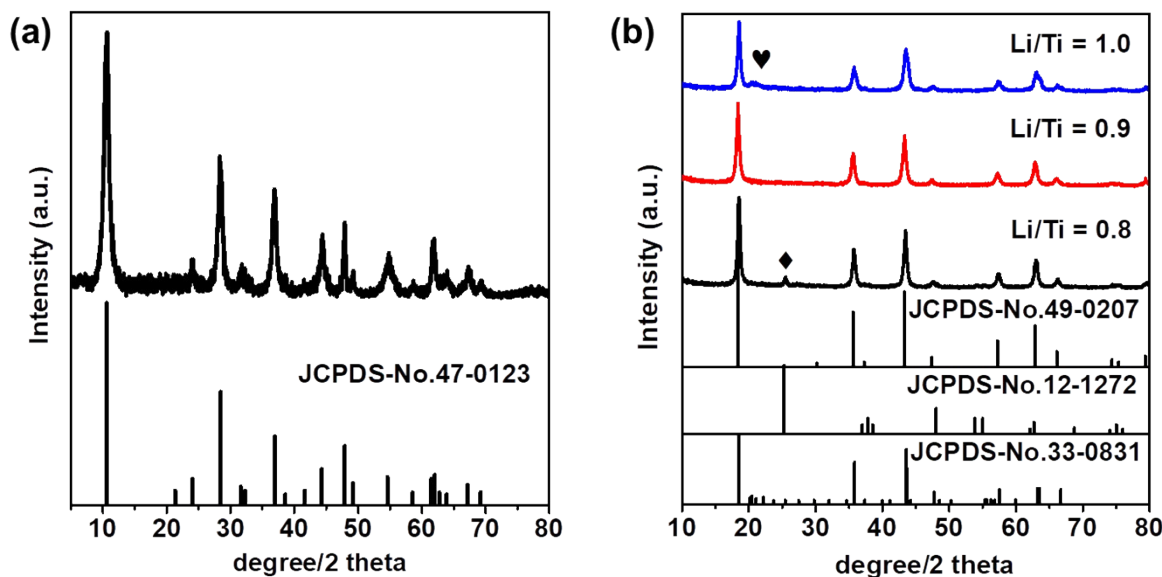

**Fig. S1.** XRD patterns of UM-LTONS precursor (a) and LTO samples synthesized with different Li/Ti molar ratios.

**Table S1.** ICP results of UM-LTONS precursor and UM-LTONS.

| <b>Samples</b>            | <b>Li (wt%)</b> | <b>Ti (wt%)</b> | <b>Molar Ratio (Li/Ti)</b> |
|---------------------------|-----------------|-----------------|----------------------------|
| <b>UM-LTONS precursor</b> | 5.59%           | 42.62%          | 0.91                       |
| <b>UM-LTONS</b>           | 6.03%           | 52.10%          | 0.80                       |

**Table S2** Summary of the BET analysis results of the three UM-LTONS samples.

| <b>Samples</b>      | <b>S<sub>BET</sub> (m<sup>2</sup> g<sup>-1</sup>)</b> | <b>V<sub>Tot</sub> (cm<sup>3</sup> g<sup>-1</sup>)</b> |
|---------------------|-------------------------------------------------------|--------------------------------------------------------|
| <b>UM-LTONS-700</b> | 125.8                                                 | 0.53                                                   |
| <b>UM-LTONS-600</b> | 181.7                                                 | 0.67                                                   |
| <b>UM-LTONS-500</b> | 174.5                                                 | 0.64                                                   |

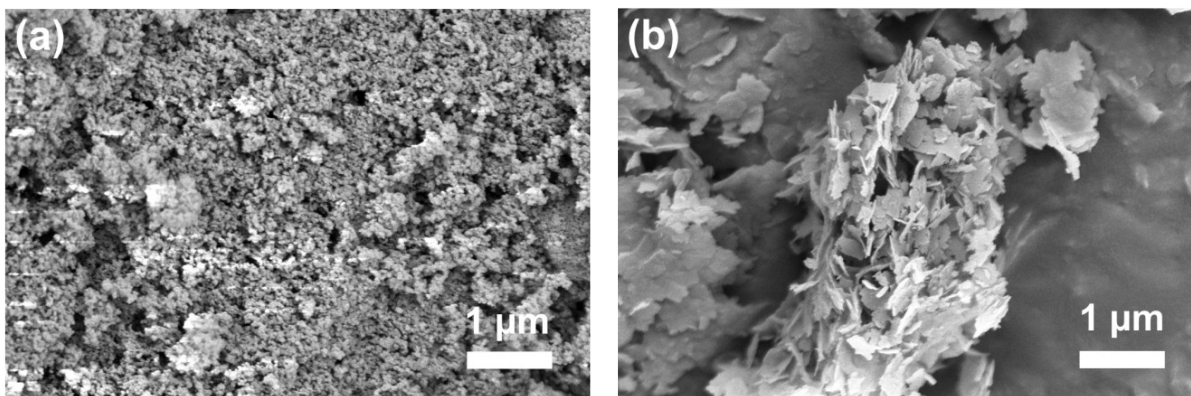

**Fig. S2.** SEM images of the LTO samples synthesized when the volume ratio between tert-butanol and water is increased to 2:1 (a) and is decreased to 1:2 (b).

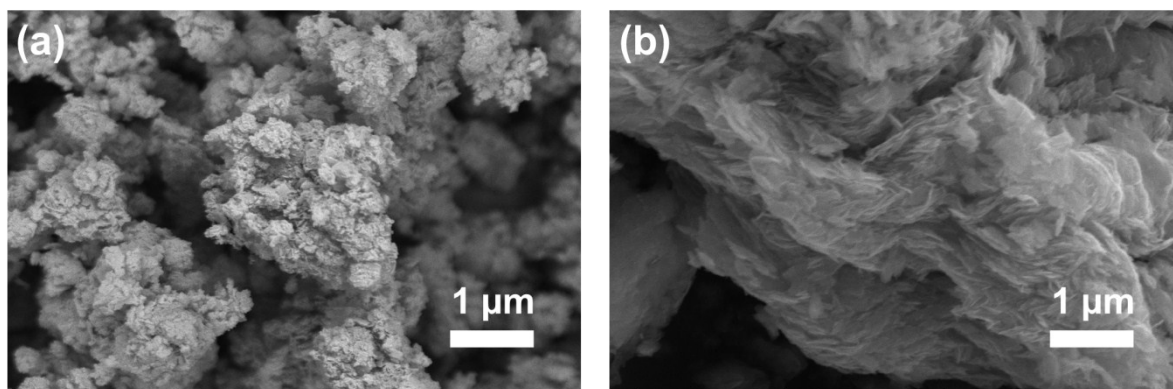

**Fig. S3.** SEM images of the LTO samples synthesized by keeping volume ratio between tert-butanol and water of 1:1 and solvothermal time of 12 hours: (a) without CTAB; (b) with CTAB.

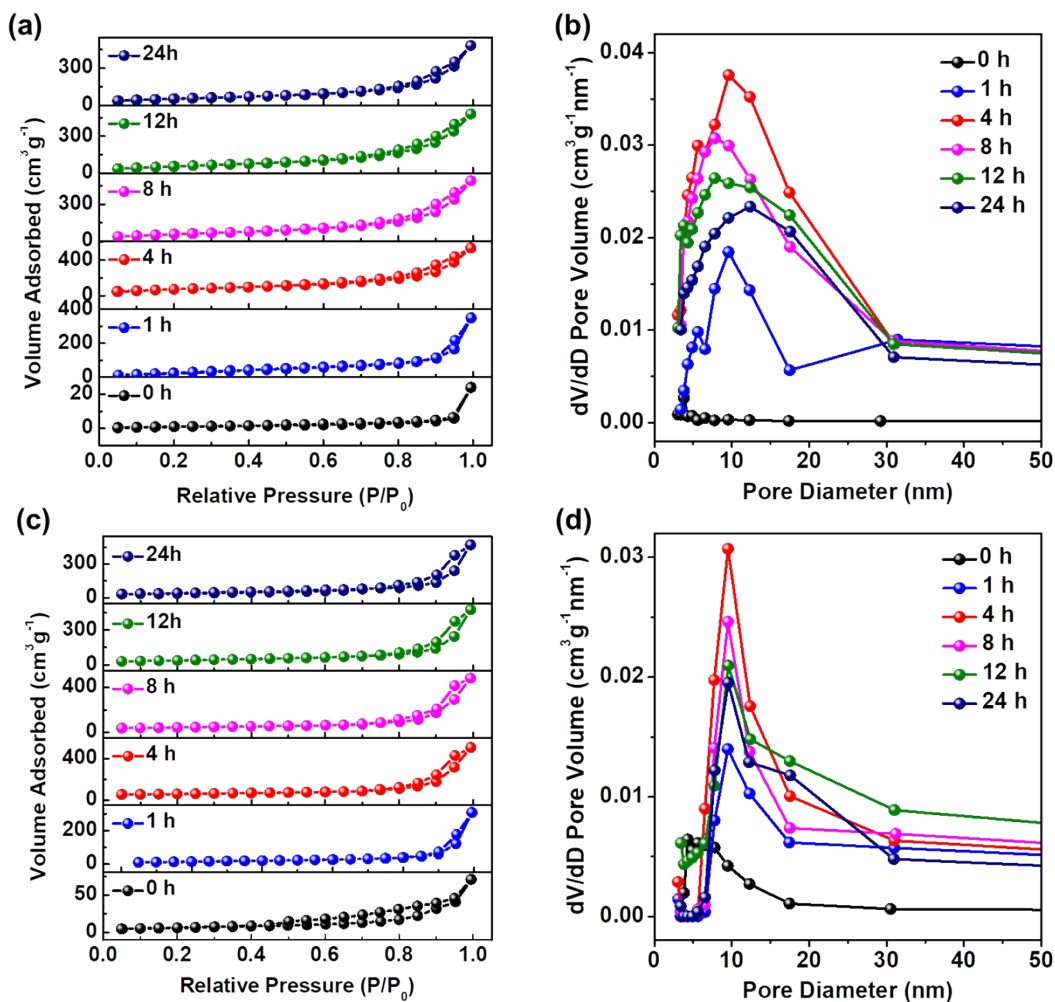

**Fig. S4** Nitrogen adsorption-desorption isotherms (a) and pore size distribution curves (b) of obtained UM-LTONS precursors prepared from different solvothermal reaction times; Nitrogen adsorption-desorption isotherms (c) and pore size distribution curves (d) of the obtained UM-LTONS prepared from different solvothermal reaction times.

**Table S3** Summary of the BET analysis results of obtained samples before and after calcination prepared from different solvothermal reaction times.

| Solvothermal<br>time (h) | Before Calcination                              |                                                  | After Calcination                               |                                                  |
|--------------------------|-------------------------------------------------|--------------------------------------------------|-------------------------------------------------|--------------------------------------------------|
|                          | $S_{\text{BET}}$ ( $\text{m}^2 \text{g}^{-1}$ ) | $V_{\text{Tot}}$ ( $\text{cm}^3 \text{g}^{-1}$ ) | $S_{\text{BET}}$ ( $\text{m}^2 \text{g}^{-1}$ ) | $V_{\text{Tot}}$ ( $\text{cm}^3 \text{g}^{-1}$ ) |
| <b>0</b>                 | 4.12                                            | 0.04                                             | 22.1                                            | 0.11                                             |
| <b>1</b>                 | 104.9                                           | 0.45                                             | 87.2                                            | 0.38                                             |
| <b>4</b>                 | 275.9                                           | 0.83                                             | 206.3                                           | 0.74                                             |
| <b>8</b>                 | 216.5                                           | 0.76                                             | 193.4                                           | 0.70                                             |
| <b>12</b>                | 203.3                                           | 0.70                                             | 181.7                                           | 0.67                                             |
| <b>24</b>                | 200.1                                           | 0.70                                             | 179.0                                           | 0.66                                             |

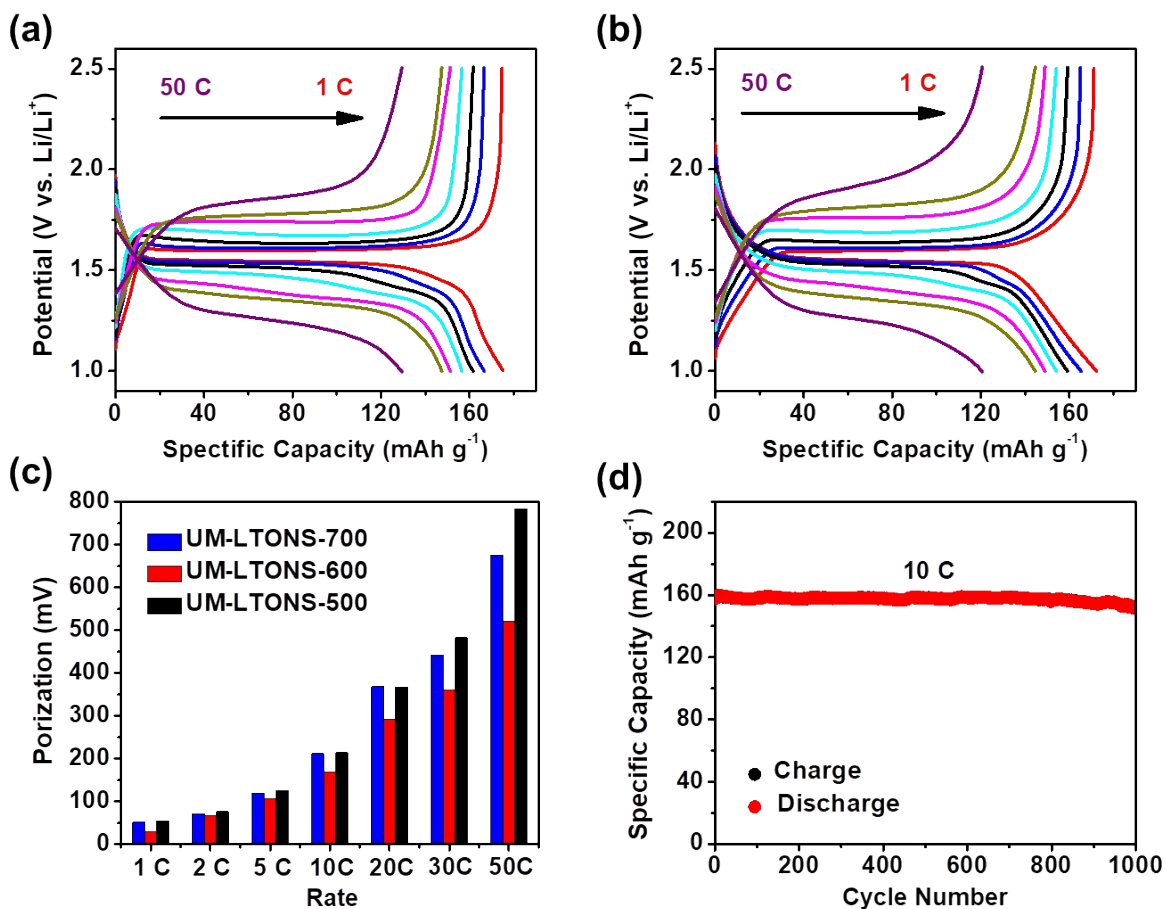

**Fig. S5** Galvanostatic discharge-charge voltage profiles of UM-LTONS-700 (a) and UM-LTONS-500 (b) at different rates; (c) The polarization voltages of different UM-LTONS at different rates; (d) Cycle performance of the UM-LTONS-600 at rate of 10 C.

**Table S4.** Summary of the high-rate cycle performance of the UM-LTONS-600 and the state-of-the-art LTO-based nanosheets anode materials.

| Samples                                                            | Cycle performance                                                  | Ref              |
|--------------------------------------------------------------------|--------------------------------------------------------------------|------------------|
| Co-doped LTO nanosheets                                            | 1000 cycles at 50 C with 97% capacity retention                    | 1                |
| Wavelike LTO                                                       | 150 cycles at 50 C with 92.7% capacity retention                   | 2                |
| Copper-Doped LTO-TiO <sub>2</sub> Nanosheets                       | 500 cycles at 30 C with 90.3% capacity retention                   | 3                |
| Ti <sup>3+</sup> -free three-phase LTO/TiO <sub>2</sub> nanosheets | 1000 cycles at 4000 mA g <sup>-1</sup> with 80% capacity retention | 4                |
| Ag quantum dots promoted LTO/TiO <sub>2</sub> nanosheets           | 500 cycles at 30 C with capacity retention of 93.3%                | 5                |
| LTO/rutile TiO <sub>2</sub> nanosheets                             | 500 cycles at 50 C with 93.1% capacity retention                   | 6                |
| <b>UM-LTONS-600</b>                                                | <b>2500 cycles at 20 C with 95% capacity retention</b>             | <b>This work</b> |

**Table S5** Summary of the EIS simulation results of the three UM-LTONS electrodes.

| Electrodes          | $R_s$ ( $\Omega$ cm <sup>-2</sup> ) | $R_{ct}$ ( $\Omega$ cm <sup>-2</sup> ) | $\sigma$ | $D_{Li}$ (cm <sup>2</sup> s <sup>-1</sup> ) |
|---------------------|-------------------------------------|----------------------------------------|----------|---------------------------------------------|
| <b>UM-LTONS-700</b> | 7.393                               | 74.17                                  | 6.34     | $3.06 \times 10^{-12}$                      |
| <b>UM-LTONS-600</b> | 4.546                               | 33.42                                  | 2.08     | $2.85 \times 10^{-11}$                      |
| <b>UM-LTONS-500</b> | 10.78                               | 81.65                                  | 8.13     | $1.86 \times 10^{-12}$                      |

## References:

1. Q. Liang, N. Cao, Z. Song, X. Gao, L. Hou, T. Guo and X. Qin, *Electrochim. Acta*, 2017, **251**, 407-414.
2. J. Liu, X. Wei and X.-W. Liu, *Sci. Rep.*, 2015, **5**, 9782.
3. C. Chen, Y. Huang, C. An, H. Zhang, Y. Wang, L. Jiao and H. Yuan, *ChemSusChem*, 2015, **8**, 114-122.
4. S. Wang, Y. Yang, W. Quan, Y. Hong, Z. Zhang, Z. Tang and J. Li, *Nano Energy*, 2017, **32**, 294-301.
5. H. Ge, L. Cui, B. Zhang, T.-Y. Ma and X.-M. Song, *J. Mater. Chem. A*, 2016, **4**, 16886-16895.
6. L. Wu, X. Leng, Y. Liu, S. Wei, C. Li, G. Wang, J. Lian, Q. Jiang, A. Nie and T. Y. Zhang, *ACS Appl. Mater. Interfaces*, 2017, **9**, 4649-4657.
